# Supplementary material
Source: Springer Nature journal article supplement (https://www.springermedizin.de/resource/supplementary/12936_2006_260_MOESM2_ESM.pdf/9547330)
Supplement: MOESM2 [file 9547330]

|            |                                                                   |     |
|------------|-------------------------------------------------------------------|-----|
| Cytb011    | GYTVSDPTI KRFFVLHFI LPFI GLCI VFI HI FFLHLHGSTNPLGYDTALKMPFYPNLL  | 215 |
| Cytb012    | GYTVSDXTI KRFFVLHFI LPFI GLCI VFI HI FFLHLHGSTNPLGYDTALKI PFYPNLL | 215 |
| Cytb014    | GYTVSDPTI KRFFVLHFI LPFI GLCI VFI HI FFLHLHGSTNPLGYDTALKI PFYPNLL | 215 |
| Cytb023    | GYTVSDPTI KRFFVLHFI LPFI GLCI VFI HI FFLHLHGSTNPLGYDTALKI PFYPNLL | 215 |
| Cytb024    | GYTVSDPTI KRFFVLHFI LPFI GLCI VFI HI FFLHLHGSTNPLGYDTALKI PFYPNLL | 215 |
| Cytb027    | GYTVSDPTI KRFFVLHFI LPFI GLCI VFI HI FFLHLHGSTNPLGYDTALKI PFYPNLL | 215 |
| Cytb028    | GYTVSDPTI KRFFVLHFI LPFI GLCI VFI HI FFLHLHGSTNPLGYDTALKI PFYPNLL | 215 |
| Cytb029    | GYTVSDPTI KRFFVLHFI LPFI GLCI VFI HI FFLHLHGSTNPLGYDTALKI PFYPNLL | 215 |
| Cytb038    | GYTVSDPTI KRFFVLHFI LPFI GLCI VFI HI FFLHLHGSTNPLGYDTALKI PFYPNLL | 215 |
| Cytb041    | GYTVSDPTI KRFFVLHFI LPFI GLCI VFI HI FFLHLHGSTNPLGYDTALKI PFYPNLL | 215 |
| Cytb043    | GYTVSDPTI KRFFVLHFI LPFI GLCI VFI HI FFLHLHGSTNPLGYDTALKI PFYPNLL | 215 |
| Cytb053    | GYTVSDPTI KRFFVLHFI LPFI GLCI VFI HI FFLHLHGSTNPLGYDTALKI PFYPNLL | 215 |
| Cytb053d10 | GYTVSDPTI KRFFVLHFI LPFI GLCI VFI HI FFLHLHGSTNPLGYDTALKI PFYPNLL | 215 |
| Cytb057    | GYTVSDPTI KRFFVLHFI LPFI GLCI VFI HI FFLHLHGSTNPLGYDTALKI PFYPNLL | 215 |
| Cytb059    | GYTVSDPTI KRFFVLHFI LPFI GLCI VFI HI FFLHLHGSTNPLGYDTALKI PFYPNLL | 215 |
| K1F        | GYTVSDPTI KRFFVLHFI LPFI GLCI VFI HI FFLHLHGSTNPLGYDTALKI PFYPNLL | 215 |
| NGTV01     | GYTVSDPTI KRFFVLHFI LPFI GLCI VFI HI FFLHLHGSTNPLGYDTALKI PFYPNLL | 215 |
| 3D7        | GYTVSDPTI KRFFVLHFI LPFI GLCI VFI HI FFLHLHGSTNPLGYDTALKI PFYPNLL | 215 |

|            |                                                                         |     |
|------------|-------------------------------------------------------------------------|-----|
| Cytb011    | SLDVKGFNNVI   LFLI QSLFGI   PLSHPDNAI VVNTYVTPSQI VPEWYFLPFYAMLKTVPSKPA | 279 |
| Cytb012    | SLDVKGFNNVI   LFLI QSLFGI   PLSHPDNAI VVNTYVTPSQI VPEWYFLPFYAMLKTVPSKPA | 279 |
| Cytb14F    | SLDVKGFNNVI   LFLI QSLFGI   PLSHPDNAI VVNTYVTPSQI VPEWYFLPFYAMLKTVPSKPA | 279 |
| Cytb023    | SLDVKGFNNVI   LFLI QSLFGI   PLSHPDNAI VVNTYVTPSQI VPEWYFLPFYAMLKTVPSKPA | 279 |
| Cytb024    | SLDVKGFNNVI   LFLTQSLFGI   PLSHPDNAI VVNTYVTPSQI VPEWHFLPFYAMLKTVPSKPA  | 279 |
| Cytb027    | SLDVKGFNNVI   LFLI QSLFGI   PLSHPDNAI VVNTYVTPSQI VPEWYFLPFYAMLKTVPSKPA | 279 |
| Cytb028    | SLDVKGFNNVI   LFLI QSLFGI   PLSHPDNAI VVNTYVTPSQI VPEWYFLPFYAMLKTVPSKPA | 279 |
| Cytb028    | SLDVKGFNNVI   LFLI QSLFGI   PLSHPDNAI VVNTYVTPSQI VPEWYFLPFYAMLKTVPSKPA | 279 |
| Cytb038    | SLDVKGFNNVI   LFLI QSLFGI   PLSHPDNAI VVNTYVTPSQI VPEWYFLPFYAMLKTVPSKPA | 279 |
| Cytb041    | SLDVKGFNNVI   LFLI QSLFGI   PLSHPDNAI VVNTYVTPSQI VPEWYFLPFYAMLKTVPSKPA | 279 |
| Cytb043    | SLDVKGFNNVI   LFLI QSLFGI   PLSHPDNAI VVNTYVTPSQI VPEWYFLPFYAMLKTVPSKPA | 279 |
| Cytb053    | SLDVKGFNNVI   LFLI QSLFGI   PLSHPDNAI VVNTYVTPSQI VPEWYFLPFYAMLKTVPSKPA | 279 |
| Cytb057    | SLDVKGFNNVI   LFLI QSLFGI   PLSHPDNAI VVNTYVTPSQI VPEWYFLPFYAMLKTVPSKPA | 279 |
| Cytb053d10 | SLDVKGFNNVI   LFLI QSLFGI   PLSHPDNAI VVNTYVTPSQI VPEWYFLPFYAMLKTVPSKPA | 279 |
| Cytb057    | SLDVKGFNNVI   LFLI QSLFGI   PLSHPDNAI VVNTYVTPSQI VPEWYFLPFYAMLKTVPSKPA | 279 |
| Cytb059    | SLDVKGFNNVI   LFLI QSLFGI   PLSHPDNAI VVNTYVTPSQI VPEWYFLPFYAMLKTVPSKPA | 279 |
| K1         | SLDVKGFNNVI   LFLI QSLFGI   PLSHPDNAI VVNTYVTPSQI VPEWYFLPFYAMLKTVPSKPA | 279 |
| NGTV01     | SLDVKGFNNVI   LFLI QSLFGI   PLSHPDNAI VVNTYVTPSQI VPEWYFLPFYAMLKTVPSKPA | 279 |
| 3D7        | SLDVKGFNNVI   LFLI QSLFGI   PLSHPDNAI VVNTYVTPSQI VPEWYFLPFYAMLKTVPSKPA | 279 |
